# Supplementary material for: Synthesis of Novel Hyperbranched Polybenzo-Bisthiazole Amide with Donor–Acceptor (D-A) Architecture, High Fluorescent Quantum Yield and Large Stokes Shift
Source: MDPI journal article supplement (doi:10.3390/polym9080304), 2017-07-25
Supplement: s1 [file s1]

## Supplementary Materials

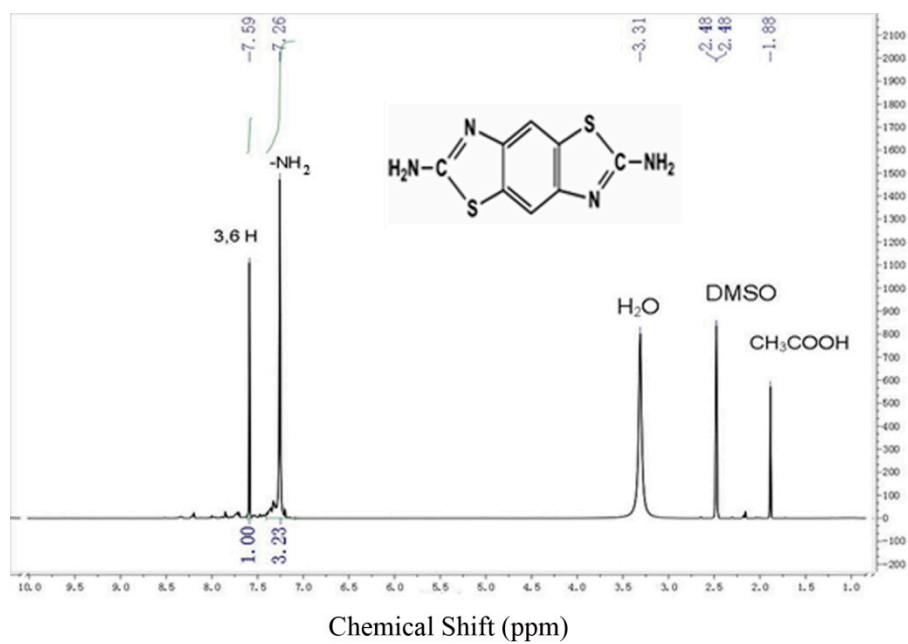

**Figure S1.** <sup>1</sup>H NMR spectrum of DABBT.

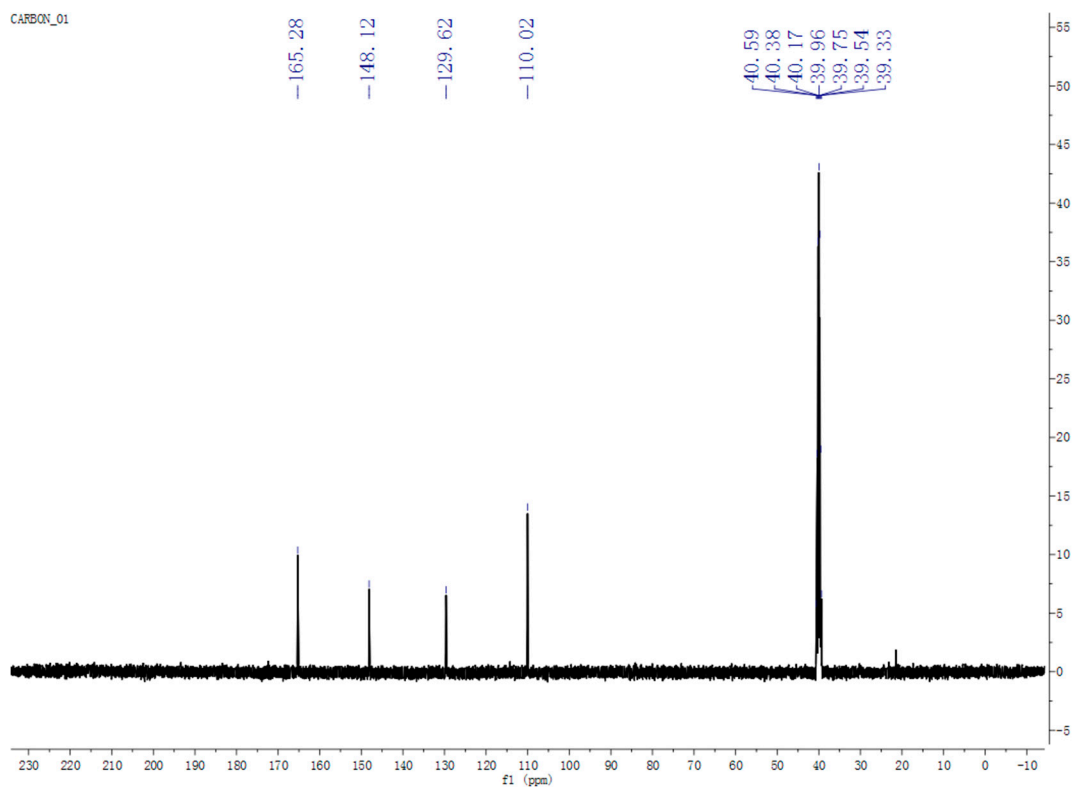

**Figure S2.** <sup>13</sup>C NMR spectrum of DABBT.

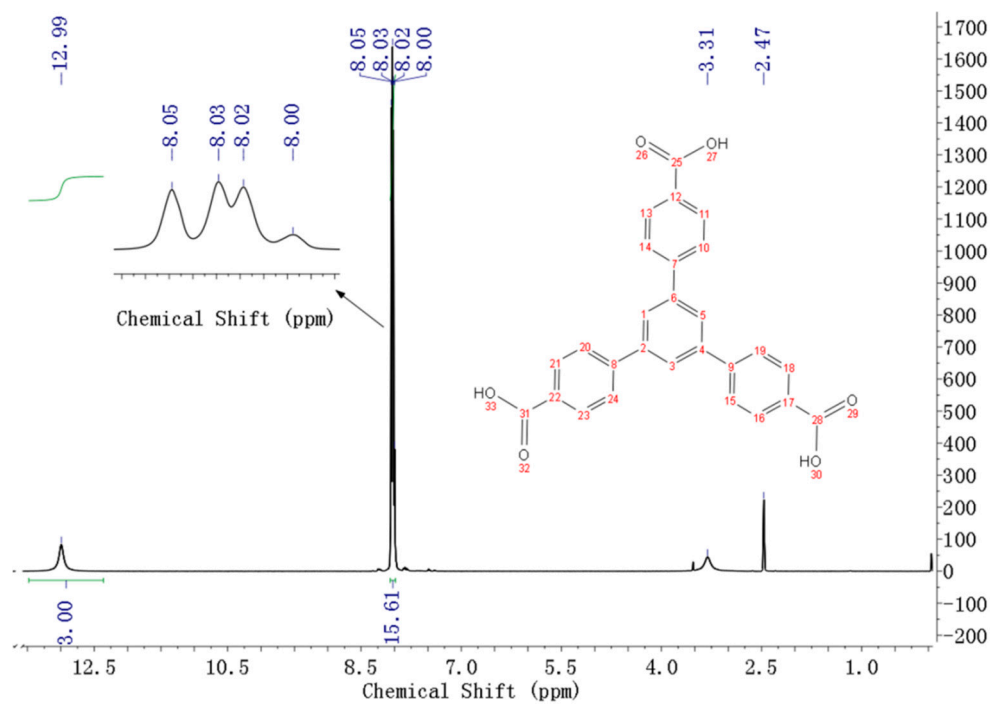

**Figure S3.** <sup>1</sup>H NMR spectrum of H<sub>3</sub>BTB.

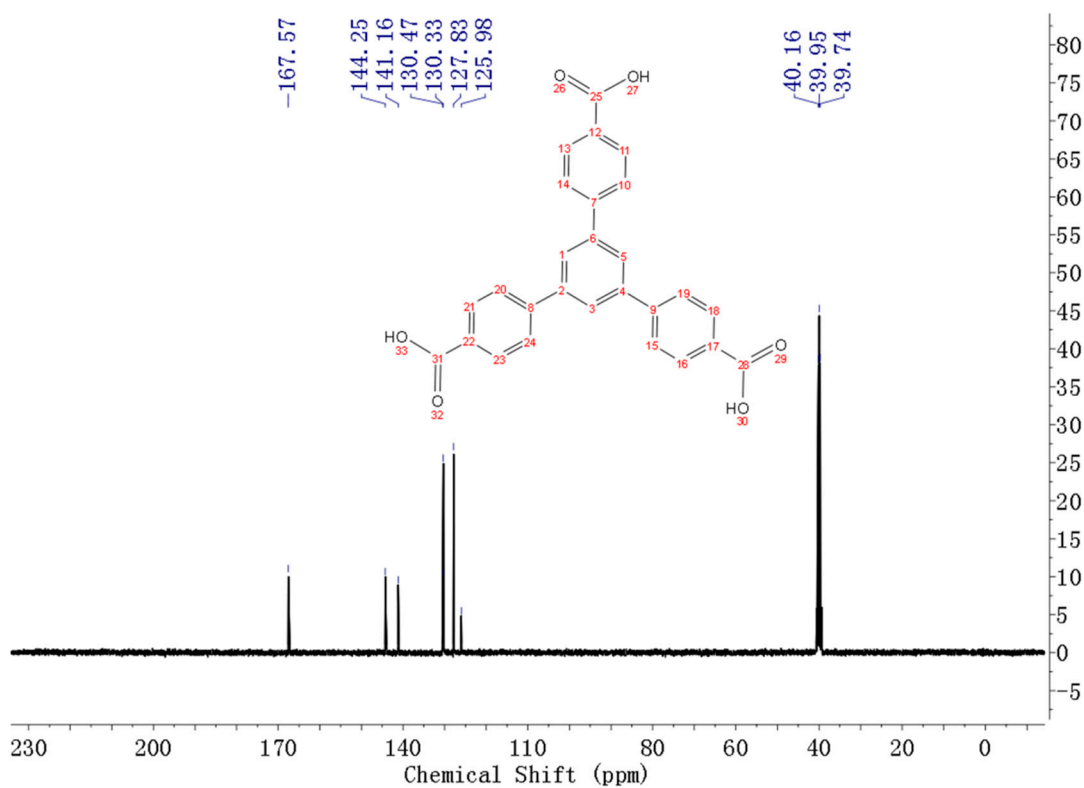

**Figure S4.** <sup>13</sup>C NMR spectrum of H<sub>3</sub>BTB.

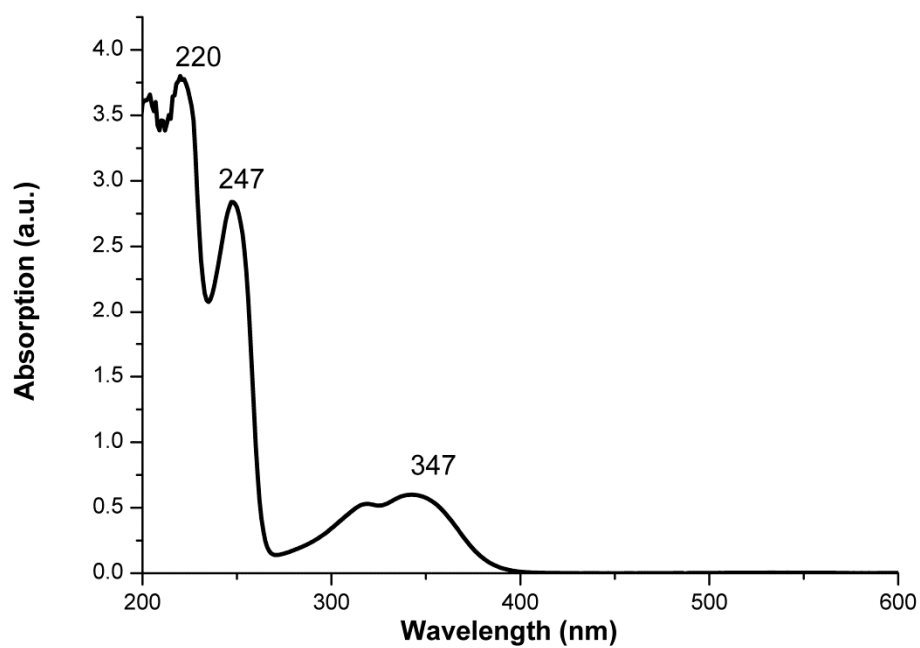

**Figure S5.** UV-vis absorption spectrum of quinine sulfate in 0.1M H<sub>2</sub>SO<sub>4</sub>.

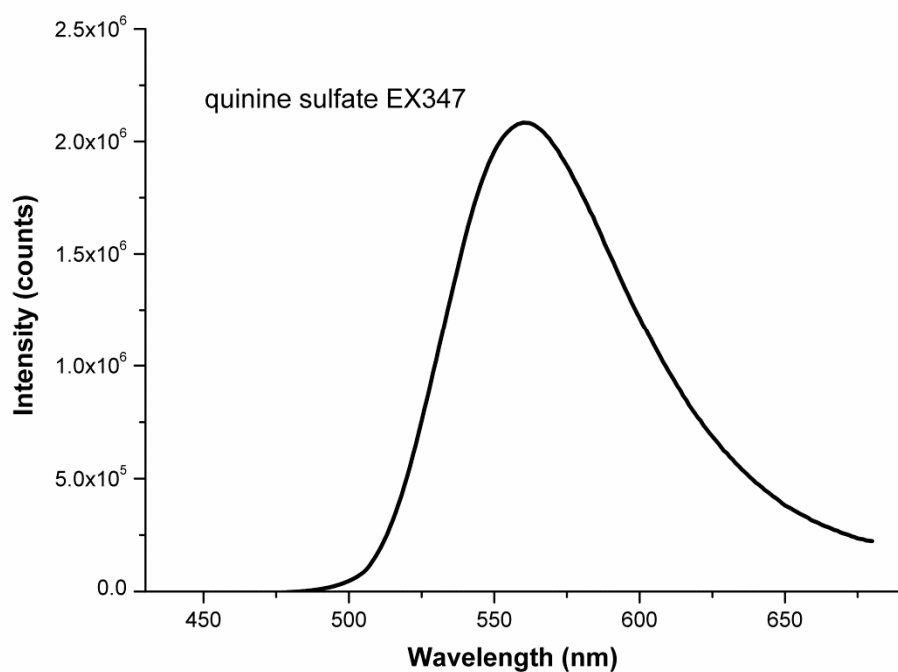

**Figure S6.** Fluorescent spectrum of quinine sulfate in 0.1M H<sub>2</sub>SO<sub>4</sub>.

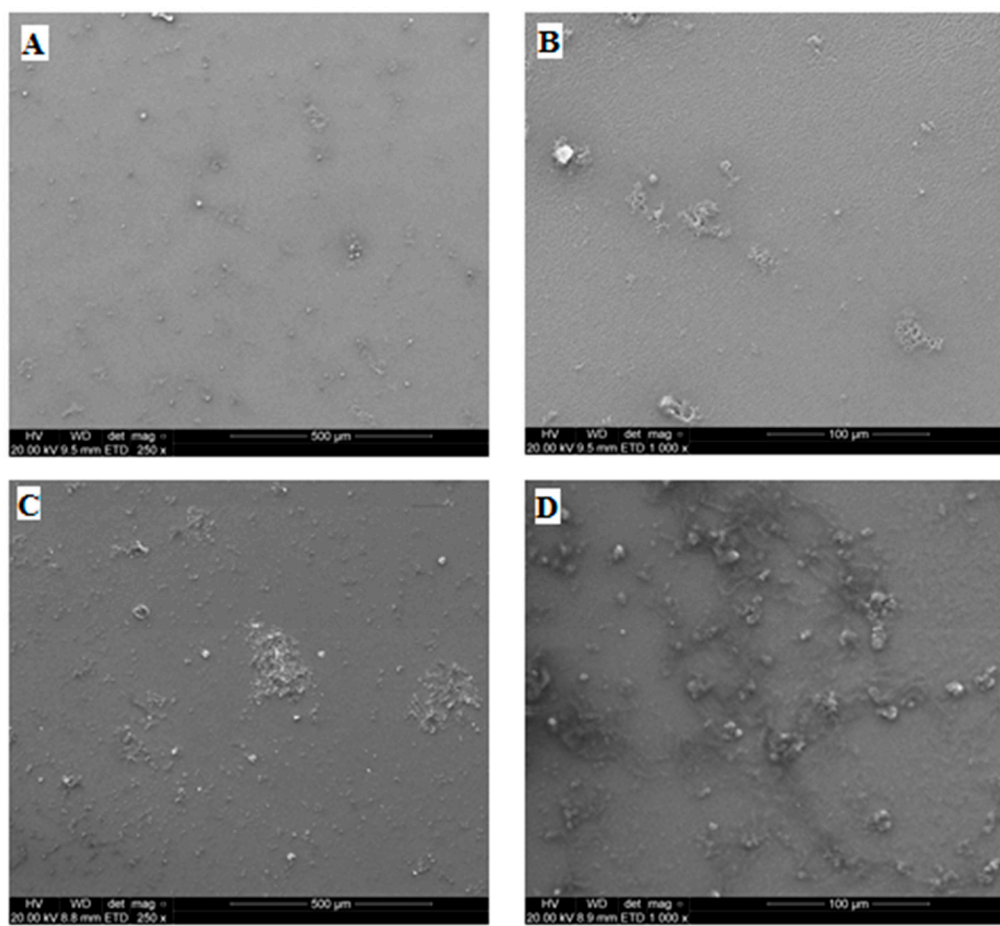

**Figure S7.** SEM images of HP-COOH (A, B) and HP-NH<sub>2</sub> (C, D) films.
